# Supplementary material for: Environmental Factors Driving the Spatial Distribution Pattern of Venerable Trees in Sichuan Province, China
Source: MDPI journal article supplement (doi:10.3390/plants11243581), 2022-12-19
Supplement: s1 [file s1]

# Supplementary materials:

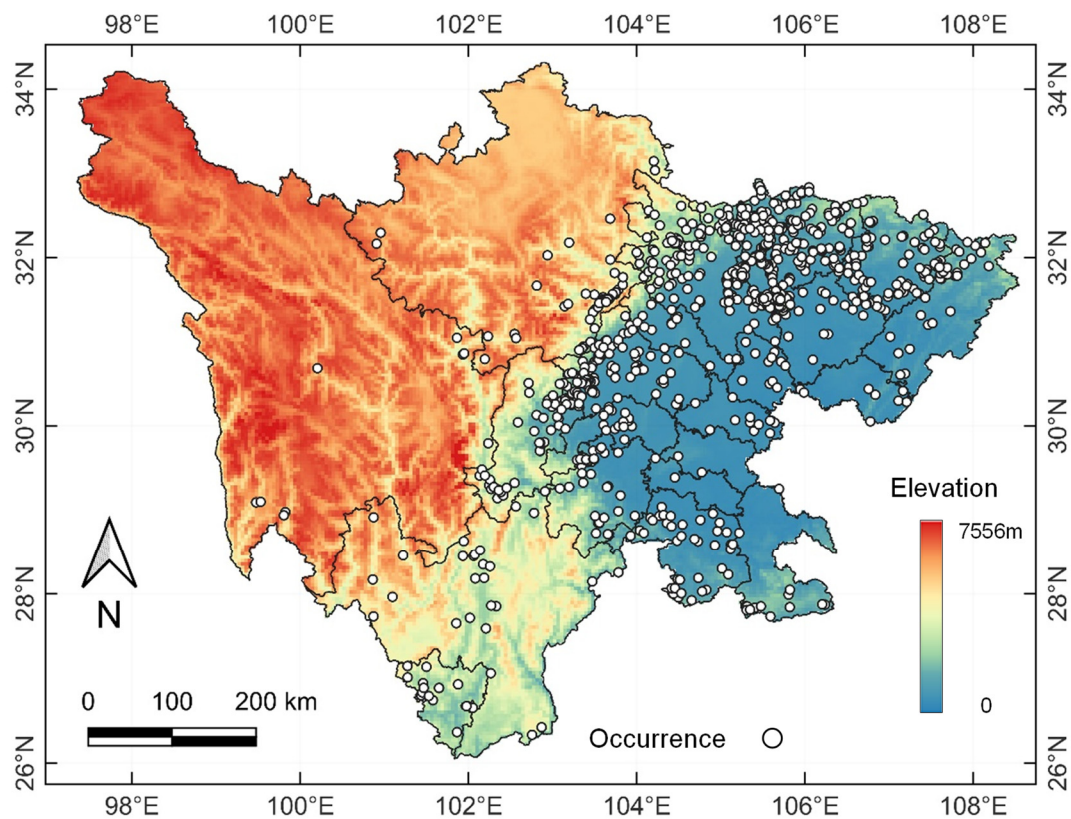

**Figure S1.** The locations of occurrence records (shown by white dots) of venerable trees in relation to elevation in Sichuan Province, China.

**Table S1.** Nineteen environmental variables that may predict the geographical distribution of venerable trees in Sichuan.

| Bioclimatic variable                | Code   | Unit  | Bioclimatic variable                | Code   | Unit  |
|-------------------------------------|--------|-------|-------------------------------------|--------|-------|
| Annual mean temperature             | Bio 1  | °C    | Mean temperature of coldest quarter | Bio 11 | °C    |
| Mean diurnal range                  | Bio 2  | °C    | Annual precipitation                | Bio 12 | mm    |
| Isothermality (Bio2/Bio7) (×100)    | Bio 3  | Index | Precipitation of wettest month      | Bio 13 | mm    |
| Temperature seasonality             | Bio 4  | Index | Precipitation of driest month       | Bio 14 | mm    |
| Max temperature of warmest month    | Bio 5  | °C    | Precipitation seasonality           | Bio 15 | Index |
| Min temperature of coldest month    | Bio 6  | °C    | Precipitation of wettest quarter    | Bio 16 | mm    |
| Temperature annual range            | Bio 7  | °C    | Precipitation of driest quarter     | Bio 17 | mm    |
| Mean temperature of wettest quarter | Bio 8  | °C    | Precipitation of warmest quarter    | Bio 18 | mm    |
| Mean temperature of driest quarter  | Bio 9  | °C    | Precipitation of coldest quarter    | Bio 19 | mm    |
| Mean temperature of warmest quarter | Bio 10 | °C    |                                     |        |       |

**Table S2.** Pearson correlation coefficient matrix of seven chosen environmental variables to predict the geographical distribution of venerable trees in Sichuan.

| Variable <sup>a</sup> | bio3     | bio7     | bio11   | bio15    | bio16   | bio18   | bio19 |
|-----------------------|----------|----------|---------|----------|---------|---------|-------|
| bio3                  | 1.000    |          |         |          |         |         |       |
| bio7                  | -0.026   | 1.000    |         |          |         |         |       |
| bio11                 | -0.317** | -0.579** | 1.000   |          |         |         |       |
| bio15                 | 0.272**  | -0.200** | 0.118** | 1.000    |         |         |       |
| bio16                 | -0.079** | -0.137** | 0.154** | 0.041    | 1.000   |         |       |
| bio18                 | -0.180** | -0.605** | 0.425** | 0.443**  | 0.105** | 1.000   |       |
| bio19                 | -0.492** | -0.525** | 0.440** | -0.381** | 0.076** | 0.577** | 1.000 |

<sup>a</sup> The meanings of bioclimatic variables can be found in Table S1.

\*\* Denotes that the difference is significant at the 0.01 level.

**Table S3.** Species composition and importance values of venerable trees in Sichuan, ranked by importance values (IV).

| Scientific name                                | Family          | DBH       | Count | RD <sup>a</sup> | RA <sup>a</sup> | IV      |
|------------------------------------------------|-----------------|-----------|-------|-----------------|-----------------|---------|
| <i>Cupressus funebris</i>                      | Cupressaceae    | 2,665,828 | 9489  | 83.972          | 88.517          | 172.489 |
| <i>Ginkgo biloba</i>                           | Ginkgoaceae     | 98,418    | 211   | 3.100           | 1.968           | 5.068   |
| <i>Ficus virens</i> var. <i>sublanceolata</i>  | Moraceae        | 105,223   | 154   | 3.314           | 1.437           | 4.751   |
| <i>Phoebe zhenнан</i>                          | Lauraceae       | 54,531    | 169   | 1.718           | 1.576           | 3.294   |
| <i>Pistacia chinensis</i>                      | Anacardiaceae   | 35,169    | 95    | 1.108           | 0.886           | 1.994   |
| <i>Keteleeria davidiana</i>                    | Pinaceae        | 22,987    | 50    | 0.724           | 0.466           | 1.190   |
| <i>Platycladus orientalis</i>                  | Cupressaceae    | 14,364    | 37    | 0.452           | 0.345           | 0.798   |
| <i>Cinnamomum camphora</i>                     | Lauraceae       | 11,098    | 29    | 0.350           | 0.271           | 0.620   |
| <i>Taxus wallichiana</i> var. <i>chinensis</i> | Taxaceae        | 10,332    | 30    | 0.325           | 0.280           | 0.605   |
| <i>Pterocarya stenoptera</i>                   | Juglandaceae    | 11,542    | 22    | 0.364           | 0.205           | 0.569   |
| <i>Juglans regia</i>                           | Juglandaceae    | 10,822    | 19    | 0.341           | 0.177           | 0.518   |
| <i>Gleditsia sinensis</i>                      | Caesalpiniaceae | 6991      | 24    | 0.220           | 0.224           | 0.444   |
| <i>Melia azedarach</i>                         | Meliaceae       | 6017      | 23    | 0.190           | 0.215           | 0.404   |
| <i>Ormosia hosiei</i>                          | Papilionaceae   | 5405      | 23    | 0.170           | 0.215           | 0.385   |
| <i>Styphnolobium japonicum</i>                 | Papilionaceae   | 7142      | 17    | 0.225           | 0.159           | 0.384   |
| <i>Cyclobalanopsis glauca</i>                  | Fagaceae        | 6208      | 18    | 0.196           | 0.168           | 0.363   |
| <i>Liquidambar formosana</i>                   | Hamamelidaceae  | 6113      | 16    | 0.193           | 0.149           | 0.342   |
| <i>Ligustrum lucidum</i>                       | Oleaceae        | 4468      | 12    | 0.141           | 0.112           | 0.253   |
| <i>Podocarpus macrophyllus</i>                 | Podocarpaceae   | 3591      | 14    | 0.113           | 0.131           | 0.244   |
| <i>Xylosma congesta</i>                        | Flacourtiaceae  | 3412      | 14    | 0.107           | 0.131           | 0.238   |
| <i>Lagerstroemia indica</i>                    | Lythraceae      | 2568      | 12    | 0.081           | 0.112           | 0.193   |
| <i>Litchi chinensis</i>                        | Sapindaceae     | 2829      | 10    | 0.089           | 0.093           | 0.182   |
| <i>Emmenopterys henryi</i>                     | Rubiaceae       | 3866      | 5     | 0.122           | 0.047           | 0.168   |
| <i>Osmanthus fragrans</i>                      | Oleaceae        | 1855      | 11    | 0.058           | 0.103           | 0.161   |
| <i>Acer oblongum</i>                           | Aceraceae       | 2309      | 9     | 0.073           | 0.084           | 0.157   |
| <i>Cycas revoluta</i>                          | Cycadaceae      | 2372      | 8     | 0.075           | 0.075           | 0.149   |
| <i>Pinus massoniana</i>                        | Pinaceae        | 1942      | 8     | 0.061           | 0.075           | 0.136   |
| <i>Pistacia weinmanniifolia</i>                | Anacardiaceae   | 2081      | 7     | 0.066           | 0.065           | 0.131   |
| <i>Keteleeria evelyniana</i>                   | Pinaceae        | 2290      | 5     | 0.072           | 0.047           | 0.119   |
| <i>Choerospondias axillaris</i>                | Anacardiaceae   | 2495      | 4     | 0.079           | 0.037           | 0.116   |
| <i>Cunninghamia lanceolata</i>                 | Taxodiaceae     | 1994      | 5     | 0.063           | 0.047           | 0.109   |
| <i>Machilus nanmu</i>                          | Lauraceae       | 1570      | 6     | 0.049           | 0.056           | 0.105   |
| <i>Bombax ceiba</i>                            | Bombacaceae     | 2196      | 3     | 0.069           | 0.028           | 0.097   |
| <i>Camellia sinensis</i>                       | Theaceae        | 321       | 9     | 0.010           | 0.084           | 0.094   |
| <i>Juniperus chinensis</i>                     | Cupressaceae    | 1463      | 5     | 0.046           | 0.047           | 0.093   |
| <i>Meliosma veitchiorum</i>                    | Sabiaceae       | 2330      | 2     | 0.073           | 0.019           | 0.092   |
| <i>Cupressus chengiana</i>                     | Cupressaceae    | 1568      | 4     | 0.049           | 0.037           | 0.087   |
| <i>Michelia wilsonii</i>                       | Lauraceae       | 1557      | 4     | 0.049           | 0.037           | 0.086   |
| <i>Populus davidiana</i>                       | Salicaceae      | 1547      | 4     | 0.049           | 0.037           | 0.086   |
| <i>Tilia tuan</i>                              | Tiliaceae       | 2104      | 2     | 0.066           | 0.019           | 0.085   |
| <i>Quercus semecarpifolia</i>                  | Fagaceae        | 1585      | 3     | 0.050           | 0.028           | 0.078   |
| <i>Quercus acutissima</i>                      | Fagaceae        | 1282      | 4     | 0.040           | 0.037           | 0.078   |
| <i>Lindera megaphylla</i>                      | Lauraceae       | 1387      | 3     | 0.044           | 0.028           | 0.072   |
| <i>Picea asperata</i>                          | Pinaceae        | 1356      | 3     | 0.043           | 0.028           | 0.071   |
| <i>Pinus bungeana</i>                          | Pinaceae        | 1020      | 4     | 0.032           | 0.037           | 0.069   |
| <i>Diospyros nigrocortex</i>                   | Ebenaceae       | 1300      | 3     | 0.041           | 0.028           | 0.069   |
| <i>Populus tomentosa</i>                       | Salicaceae      | 1350      | 2     | 0.043           | 0.019           | 0.061   |
| <i>Castanopsis platyacantha</i>                | Fagaceae        | 946       | 3     | 0.030           | 0.028           | 0.058   |

|                                              |                 |      |   |       |       |       |
|----------------------------------------------|-----------------|------|---|-------|-------|-------|
| <i>Abies fabri</i>                           | Pinaceae        | 852  | 3 | 0.027 | 0.028 | 0.055 |
| <i>Tsuga dumosa</i>                          | Pinaceae        | 1130 | 2 | 0.036 | 0.019 | 0.054 |
| <i>Tsuga chinensis</i>                       | Pinaceae        | 818  | 3 | 0.026 | 0.028 | 0.054 |
| <i>Lagerstroemia excelsa</i>                 | Lythraceae      | 767  | 3 | 0.024 | 0.028 | 0.052 |
| <i>Kalopanax septemlobus</i>                 | Araliaceae      | 1002 | 2 | 0.032 | 0.019 | 0.050 |
| <i>Litsea coreana</i> var. <i>lanuginosa</i> | Lauraceae       | 624  | 3 | 0.020 | 0.028 | 0.048 |
| <i>Ehretia dicksonii</i>                     | Boraginaceae    | 885  | 2 | 0.028 | 0.019 | 0.047 |
| <i>Camellia gymnogyna</i>                    | Theaceae        | 587  | 3 | 0.018 | 0.028 | 0.046 |
| <i>Pseudotsuga sinensis</i>                  | Pinaceae        | 848  | 2 | 0.027 | 0.019 | 0.045 |
| <i>Ficus religiosa</i>                       | Moraceae        | 535  | 3 | 0.017 | 0.028 | 0.045 |
| <i>Ziziphus jujuba</i> var. <i>spinosa</i>   | Rhamnaceae      | 816  | 2 | 0.026 | 0.019 | 0.044 |
| <i>Juniperus saltuaria</i>                   | Cupressaceae    | 785  | 2 | 0.025 | 0.019 | 0.043 |
| <i>Celtis sinensis</i>                       | Ulmaceae        | 681  | 2 | 0.021 | 0.019 | 0.040 |
| <i>Populus cathayana</i>                     | Salicaceae      | 950  | 1 | 0.030 | 0.009 | 0.039 |
| <i>Cinnamomum longepaniculatum</i>           | Lauraceae       | 625  | 2 | 0.020 | 0.019 | 0.038 |
| <i>Acer pictum</i> subsp. <i>mono</i>        | Aceraceae       | 614  | 2 | 0.019 | 0.019 | 0.038 |
| <i>Quercus variabilis</i>                    | Fagaceae        | 603  | 2 | 0.019 | 0.019 | 0.038 |
| <i>Cyclobalanopsis gracilis</i>              | Fagaceae        | 288  | 3 | 0.009 | 0.028 | 0.037 |
| <i>Vitex negundo</i>                         | Verbenaceae     | 554  | 2 | 0.017 | 0.019 | 0.036 |
| <i>Radermachera microcalyx</i>               | Bignoniaceae    | 541  | 2 | 0.017 | 0.019 | 0.036 |
| <i>Cupressus duclouxiana</i>                 | Cupressaceae    | 540  | 2 | 0.017 | 0.019 | 0.036 |
| <i>Quercus spinosa</i>                       | Fagaceae        | 512  | 2 | 0.016 | 0.019 | 0.035 |
| <i>Engelhardia roxburghiana</i>              | Juglandaceae    | 785  | 1 | 0.025 | 0.009 | 0.034 |
| <i>Ormosia yaanensis</i>                     | Papilionaceae   | 785  | 1 | 0.025 | 0.009 | 0.034 |
| <i>Acer buergerianum</i>                     | Aceraceae       | 487  | 2 | 0.015 | 0.019 | 0.034 |
| <i>Morus australis</i>                       | Moraceae        | 760  | 1 | 0.024 | 0.009 | 0.033 |
| <i>Lindera aggregata</i>                     | Lauraceae       | 442  | 2 | 0.014 | 0.019 | 0.033 |
| <i>Cercis chinensis</i>                      | Caesalpiniaceae | 439  | 2 | 0.014 | 0.019 | 0.032 |
| <i>Meliosma alba</i>                         | Sabiaceae       | 637  | 1 | 0.020 | 0.009 | 0.029 |
| <i>Acer flabellatum</i>                      | Aceraceae       | 584  | 1 | 0.018 | 0.009 | 0.028 |
| <i>Juniperus squamata</i>                    | Cupressaceae    | 565  | 1 | 0.018 | 0.009 | 0.027 |
| <i>Populus alba</i>                          | Salicaceae      | 540  | 1 | 0.017 | 0.009 | 0.026 |
| <i>Bischofia polycarpa</i>                   | Euphorbiaceae   | 502  | 1 | 0.016 | 0.009 | 0.025 |
| <i>Yulania liliiflora</i>                    | Magnoliaceae    | 495  | 1 | 0.016 | 0.009 | 0.025 |
| <i>Ailanthus altissima</i>                   | Simaroubaceae   | 480  | 1 | 0.015 | 0.009 | 0.024 |
| <i>Diospyros kaki</i>                        | Ebenaceae       | 480  | 1 | 0.015 | 0.009 | 0.024 |
| <i>Sorbus pohuashanensis</i>                 | Rosaceae        | 480  | 1 | 0.015 | 0.009 | 0.024 |
| <i>Photinia glomerata</i>                    | Rosaceae        | 452  | 1 | 0.014 | 0.009 | 0.024 |
| <i>Laurocerasus zippeliana</i>               | Rosaceae        | 408  | 1 | 0.013 | 0.009 | 0.022 |
| <i>Lithocarpus confinis</i>                  | Fagaceae        | 408  | 1 | 0.013 | 0.009 | 0.022 |
| <i>Aidia canthioides</i>                     | Rubiaceae       | 404  | 1 | 0.013 | 0.009 | 0.022 |
| <i>Celtis biondii</i>                        | Ulmaceae        | 399  | 1 | 0.013 | 0.009 | 0.022 |
| <i>Castanea mollissima</i>                   | Fagaceae        | 393  | 1 | 0.012 | 0.009 | 0.022 |
| <i>Quercus acrodonta</i>                     | Fagaceae        | 380  | 1 | 0.012 | 0.009 | 0.021 |
| <i>Albizia kalkora</i>                       | Mimosaceae      | 377  | 1 | 0.012 | 0.009 | 0.021 |
| <i>Buxus sinica</i>                          | Buxaceae        | 377  | 1 | 0.012 | 0.009 | 0.021 |
| <i>Dalbergia hupeana</i>                     | Papilionaceae   | 360  | 1 | 0.011 | 0.009 | 0.021 |
| <i>Elaeocarpus japonicus</i>                 | Elaeocarpaceae  | 330  | 1 | 0.010 | 0.009 | 0.020 |
| <i>Morus macroura</i>                        | Moraceae        | 316  | 1 | 0.010 | 0.009 | 0.019 |
| <i>Rosa chinensis</i>                        | Rosaceae        | 308  | 1 | 0.010 | 0.009 | 0.019 |
| <i>Beilschmiedia delicata</i>                | Lauraceae       | 304  | 1 | 0.010 | 0.009 | 0.019 |
| <i>Sloanea sinensis</i>                      | Elaeocarpaceae  | 301  | 1 | 0.009 | 0.009 | 0.019 |
| <i>Yulania dawsoniana</i>                    | Magnoliaceae    | 298  | 1 | 0.009 | 0.009 | 0.019 |

|                                             |                   |           |        |         |         |         |
|---------------------------------------------|-------------------|-----------|--------|---------|---------|---------|
| <i>Pinus yunnanensis</i>                    | Pinaceae          | 289       | 1      | 0.009   | 0.009   | 0.018   |
| <i>Pyrus betulifolia</i>                    | Rosaceae          | 260       | 1      | 0.008   | 0.009   | 0.018   |
| <i>Quercus mongolica</i>                    | Fagaceae          | 242       | 1      | 0.008   | 0.009   | 0.017   |
| <i>Crataegus pinnatifida</i>                | Rosaceae          | 229       | 1      | 0.007   | 0.009   | 0.017   |
| <i>Michelia martini</i>                     | Magnoliaceae      | 226       | 1      | 0.007   | 0.009   | 0.016   |
| <i>Morus alba</i>                           | Moraceae          | 220       | 1      | 0.007   | 0.009   | 0.016   |
| <i>Ulmus parvifolia</i>                     | Ulmaceae          | 207       | 1      | 0.007   | 0.009   | 0.016   |
| <i>Wisteria sinensis</i>                    | Papilionaceae     | 206       | 1      | 0.006   | 0.009   | 0.016   |
| <i>Quercus aquifolioides</i>                | Fagaceae          | 204       | 1      | 0.006   | 0.009   | 0.016   |
| <i>Ziziphus jujuba</i>                      | Rhamnaceae        | 200       | 1      | 0.006   | 0.009   | 0.016   |
| <i>Idesia polycarpa</i> var. <i>vestita</i> | Flacourtiaceae    | 165       | 1      | 0.005   | 0.009   | 0.015   |
| <i>Cinnamomum japonicum</i>                 | Lauraceae         | 160       | 1      | 0.005   | 0.009   | 0.014   |
| <i>Cercidiphyllum japonicum</i>             | Cercidiphyllaceae | 143       | 1      | 0.005   | 0.009   | 0.014   |
| <i>Castanea henryi</i>                      | Fagaceae          | 138       | 1      | 0.004   | 0.009   | 0.014   |
| <i>Myrica rubra</i>                         | Myricaceae        | 138       | 1      | 0.004   | 0.009   | 0.014   |
| <i>Camellia japonica</i>                    | Theaceae          | 110       | 1      | 0.003   | 0.009   | 0.013   |
| <i>Diospyros oleifera</i>                   | Ebenaceae         | 102       | 1      | 0.003   | 0.009   | 0.013   |
| <i>Armeniaca mume</i>                       | Rosaceae          | 100       | 1      | 0.003   | 0.009   | 0.012   |
| <i>Amygdalus persica</i>                    | Rosaceae          | 95        | 1      | 0.003   | 0.009   | 0.012   |
| <i>Morus mongolica</i>                      | Moraceae          | 88        | 1      | 0.003   | 0.009   | 0.012   |
| <i>Diospyros armata</i>                     | Ebenaceae         | 79        | 1      | 0.002   | 0.009   | 0.012   |
| <i>Koilodepas hainanense</i>                | Euphorbiaceae     | 65        | 1      | 0.002   | 0.009   | 0.011   |
| Total                                       |                   | 3,174,644 | 10,720 | 100.000 | 100.000 | 200.000 |

<sup>a</sup> RD denotes relative dominance, and RA relative abundance.

**Table S4.** Predicted suitable habitats for venerable trees in Sichuan under current and future climate scenarios.

| Suitability category | Predicted area (x 10 <sup>4</sup> km <sup>2</sup> ) |         | Area change<br>(x 10 <sup>4</sup> km <sup>2</sup> ) | Change ratio (%) |
|----------------------|-----------------------------------------------------|---------|-----------------------------------------------------|------------------|
|                      | Current                                             | Future  |                                                     |                  |
| <b>Excellent</b>     |                                                     | 12,579  | 18                                                  | 0.15             |
| Very high            | 57,398                                              | 67,856  | 10,458                                              | 18.22            |
| High                 | 74,495                                              | 78,184  | 3689                                                | 4.95             |
| Medium               | 52,455                                              | 51,865  | -590                                                | -1.13            |
| Low                  | 130,750                                             | 117,618 | -13,132                                             | -10.04           |
| Not suitable         | 158,342                                             | 157,899 | -443                                                | -0.28            |
